# Supplementary material for: Shape dependent sensing potential of gold nanoparticles in etching based multicolorimetric plasmonic-ELISA
Source: Royal Society of Chemistry journal article supplement (doi:10.1039/d2na00266c), 2022-01-01
Supplement: d2na00266c1.pdf [file d2na00266c1.pdf]

## Electronic Supplementary Information (ESI)

### Shape Dependent Sensing Behaviour of Gold Nanoparticles in Etching based Multicolorimetric Plasmonic-ELISA

Sangeeta Yadav<sup>a</sup>, Jitendra Satija<sup>b\*</sup>

<sup>a</sup>School of Biosciences and Technology, Vellore Institute of Technology Vellore, Tamil Nadu, 632014

<sup>b</sup>Centre for Nanobiotechnology (CNBT), Vellore Institute of Technology Vellore, Tamil Nadu, 632014

\* Corresponding author: jsatija11@gmail.com; jsatija@vit.ac.in

**Table S1.** UV-Vis absorbance of TMB<sup>2+</sup> observed/recorded at 450 nm and corresponding concentrations calculated using Beer-Lambert law.

| S. No. | Absorbance (a.u.) | Concentrations of the TMB <sup>2+</sup> (μM) |
|--------|-------------------|----------------------------------------------|
| 1.     | 1.6               | 27 μM                                        |
| 2.     | 1.8               | 30 μM                                        |
| 3.     | 1.0               | 16 μM                                        |

According to Beer-Lambert law:

$$A = \epsilon cl$$

$$c = \frac{A}{\epsilon l}$$

where A = absorbance, c = solute molar concentration in M, l = the length of the path travelled by the light through the sample in centimeters (cm) and  $\epsilon$  = molar extinction coefficient in M<sup>-1</sup>cm<sup>-1</sup>.

For example in case 1 from the table S1:

$$\varepsilon^{TMB^{2+}} = 5.9 \times 10^4 M^{-1} cm^{-1}$$

$$l = 1 cm$$

$$A = 1.6 a.u.$$

$$c = \frac{1.6}{5.9 \times 10^4 \times 1} = 27 \mu M$$

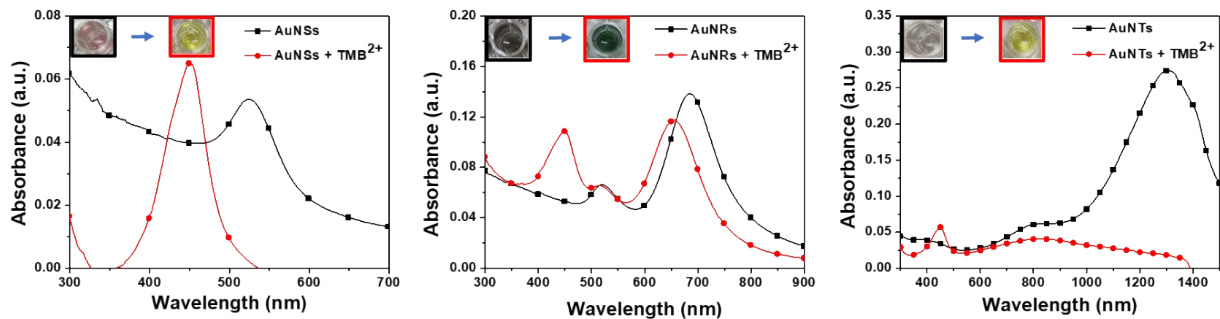

**Fig. S1.** UV-Vis spectra of all three types of MNPs before (black curve) and after interaction with  $TMB^{2+}$  (conc. =  $65 \mu M$ ) (red curve).

**Table S2.** The supplement data and the relative standard deviation for the developed indirect competitive p-ELISA.

| <b>HlgG concentration</b> | <b>Average absorbance value at 688nm (mean <math>\pm</math> SD)</b> | <b>%SD value of Average</b> |
|---------------------------|---------------------------------------------------------------------|-----------------------------|
| 1 fg/mL                   | $0.078 \pm 0.002$                                                   | 2.56                        |
| 10 fg/mL                  | $0.092 \pm 0.014$                                                   | 15.21                       |
| 100 fg/mL                 | $0.116 \pm 0.004$                                                   | 3.44                        |
| 1 pg/mL                   | $0.140 \pm 0.006$                                                   | 4.28                        |

|          |                   |      |
|----------|-------------------|------|
| 10 pg/mL | $0.150 \pm 0.014$ | 9.33 |
|----------|-------------------|------|

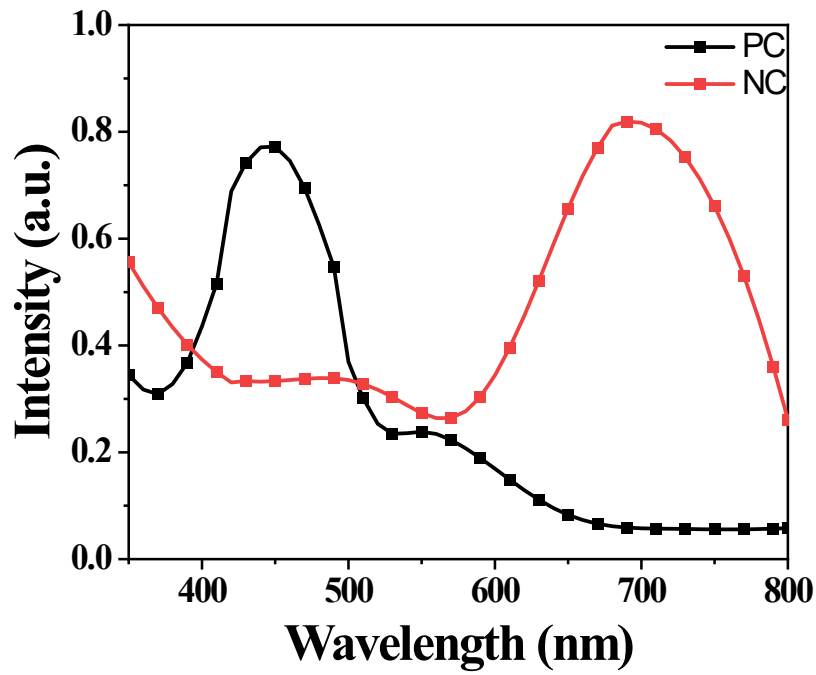

**Fig. S2.** UV-Vis absorption spectra of AuNRs obtained from the positive control (PC, black) and negative control (NC, red) control study.

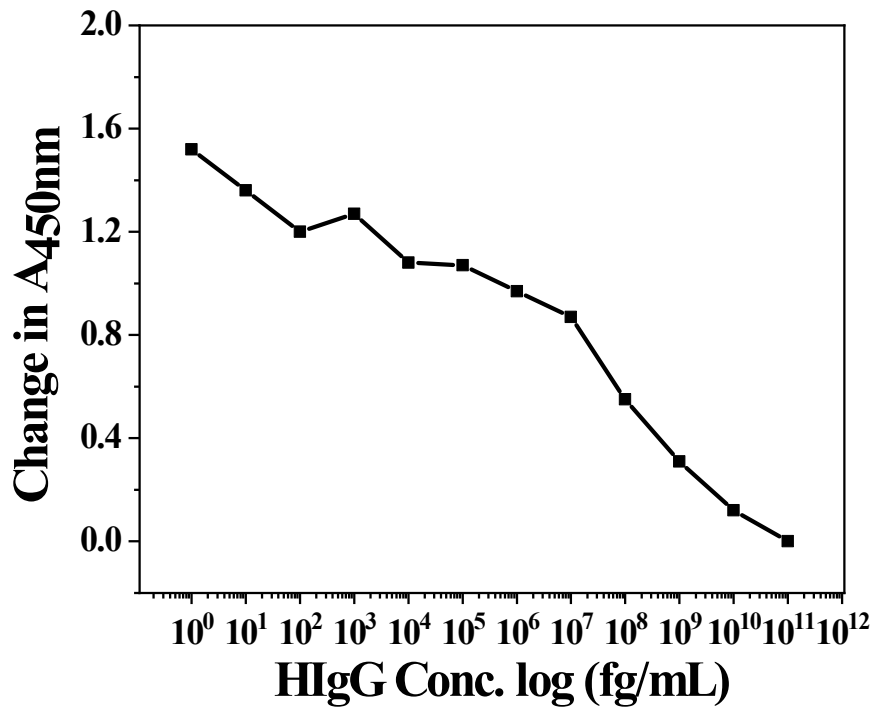

**Fig. S3.** UV-Vis spectra of change in the absorbance value at 450 nm as a function of sample HIgG concentration.
